# Supplementary material for: Cause-Specific Mortality Trends in a Large Population-Based Cohort With Long-Standing Childhood-Onset Type 1 Diabetes
Source: PubMed Central journal article supplement — Diabetes. 2010 Aug 25;59(12):3216–22. doi: 10.2337/db10-0862 (PMC2992785; doi:10.2337/db10-0862), 2010-08-25
Supplement: supp_db10-0862_db100862onlineappendix.pdf [file supp_db10-0862_db100862onlineappendix.pdf]

**Supplemental Figure 1.** Distribution of underlying causes of death by duration of diabetes (10-year intervals) and (A) sex; (B) race; and (C) diabetes diagnosis cohort. Ten deaths where the cause of death was unknown were excluded.

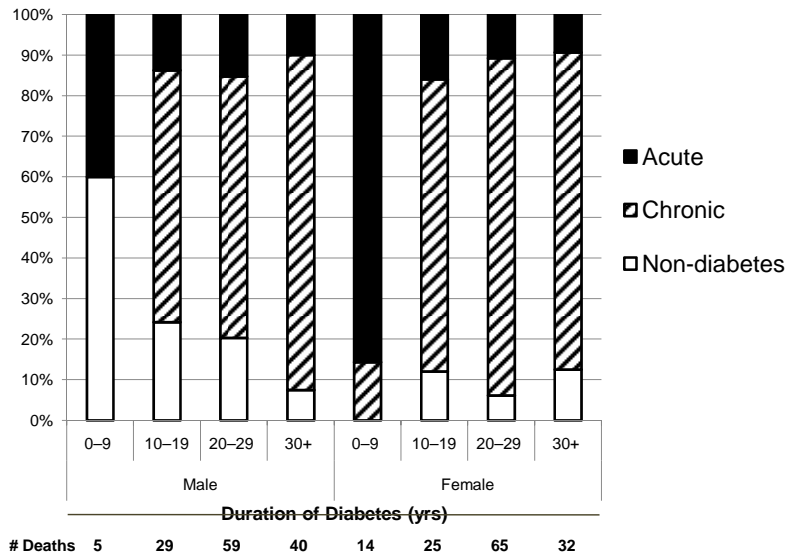

Supplemental Figure 1A

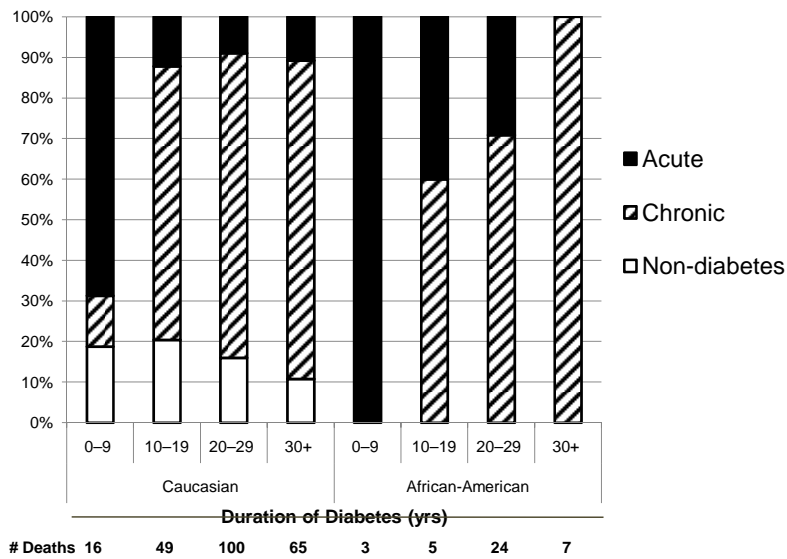

Supplemental Figure 1B

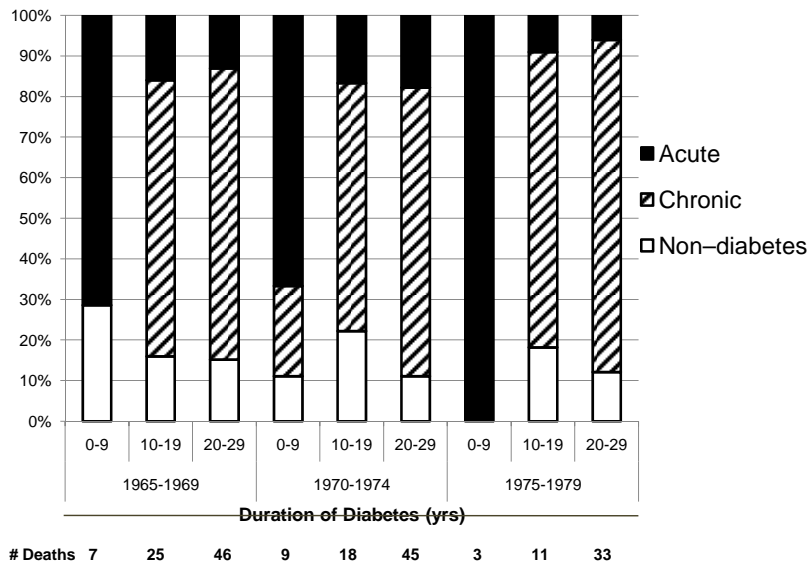

Supplemental Figure 1C
